# Supplementary material for: Mobilization of platinum and palladium from exhausted catalytic converters using bio-cyanide and an ionic-liquid as mass transport carriers
Source: Royal Society of Chemistry journal article supplement (doi:10.1039/d2gc00874b), 2022-01-01
Supplement: d2gc00874b1.pdf [file d2gc00874b1.pdf]

## Electronic Supplementary Information

### Mobilization of platinum and palladium from exhausted catalytic converters using bio-cyanide and ionic-liquid as mass transport carriers†

Sadia Ilyas,<sup>\*a</sup> Rajiv Ranjan Srivastava<sup>b,c</sup> and Hyunjung Kim<sup>\*a</sup>

<sup>a</sup>Department of Earth Resources & Environmental Engineering, Hanyang University, 222-Wangsimni-ro, Seongdong-gu, Seoul-04763, Republic of Korea.

<sup>b</sup>Center for Advanced Chemistry, Institute of Research and Development, Duy Tan University, Da Nang-550000, Vietnam.

<sup>c</sup>Faculty of Natural Sciences, Duy Tan University, Da Nang-550000, Vietnam.

**\*Corresponding authors:**

[sadiailyas1@yahoo.com](mailto:sadiailyas1@yahoo.com) (S. Ilyas)

[kshjkim@hanyang.ac.kr](mailto:kshjkim@hanyang.ac.kr) (H. Kim)

**Table S1.** Literature summary of PGMs' extraction using ionic liquids at different conditions and salient features.

| <b>Ionic liquid</b>                 | <b>Optimal Concentration</b>                                                                                                                                                      | <b>Important remarks</b>                                                                                                                                                                            | <b>References</b> |
|-------------------------------------|-----------------------------------------------------------------------------------------------------------------------------------------------------------------------------------|-----------------------------------------------------------------------------------------------------------------------------------------------------------------------------------------------------|-------------------|
| Polymerized supported IL            | IL 20% yielded 86% Pt and 96% Pd recovery of purity 99%.                                                                                                                          | PSILP material demonstrated excellent separation of PGMs from major accompanying interferences in a single separation step.                                                                         | [1]               |
| Aliquat-336                         | 3 mg/L Aliquat-336 yielded >99% extraction efficiency of PGMs, selective stripping of Pd in 1.0 mol.L <sup>-1</sup> NaOH and Pt in 1.0 mol.L <sup>-1</sup> thiourea was achieved. | The authors obtained a good selectivity over Au(III) over Pt and Pd in the extraction stage.                                                                                                        | [2]               |
| [Tf <sub>2</sub> N] <sup>-</sup> IL | 100% as such solvent used disulfide, alkenyl, and nitrile group attached ionic liquid exhibited high Pd-extraction.                                                               | Cation ring structure showed a large influence on the extraction process.                                                                                                                           | [3]               |
| Cyphos IL 104                       | Without dilution used IL yielded selective Ru(III) with 70% efficacy, leaving all Rh(III) into raffinate.                                                                         | Stripping was performed using 0.1 mol.L <sup>-1</sup> thiourea in 0.5 mol.L <sup>-1</sup> HCl.                                                                                                      | [4, 5]            |
| Cyphos IL 101                       | 0.6 g/L IL 101 used that yielded >99% Pt-Pd extraction over Rh. Co-extracted Pt and Pd was separated by sequential stripping with NaSCN and CH <sub>4</sub> N <sub>2</sub> S.     | Stoichiometry requirement of ionic liquid changes from 1 to 3 times with differing acid concentration from 0.1–4.0 mol.L <sup>-1</sup> ; however, Pt did not show any effect of acid concentration. | [5, 6]            |

**Table S2.** Summary of the test procedures adopted for toxicity assessment.

| <b>Item description</b> | <b>TCLP</b>                                                     | <b>SPLP</b>                                       | <b>TTLC</b>                                                              |
|-------------------------|-----------------------------------------------------------------|---------------------------------------------------|--------------------------------------------------------------------------|
| Leaching agents         | C <sub>2</sub> H <sub>4</sub> O <sub>2</sub> , H <sub>2</sub> O | H <sub>2</sub> SO <sub>4</sub> , H <sub>2</sub> O | HNO <sub>3</sub> , HCl, H <sub>2</sub> O <sub>2</sub> , H <sub>2</sub> O |
| Sample amount           | 100 g                                                           | 100 g                                             | 1.0 g                                                                    |
| Volume                  | 2 L                                                             | 2 L                                               | 100 mL                                                                   |
| Duration                | 18 h                                                            | 18 h                                              | 48 h                                                                     |
| Analyte                 | Heavy metals                                                    | Heavy metals                                      | Heavy metals                                                             |
| Instrument used         | ICP-MS                                                          | ICP-MS                                            | ICP-MS                                                                   |

**Table S3.** The conditions used for determining the energy consumption for milling of exhausted catalytic converters to size reduction up to 150  $\mu\text{m}$ .

| Milling type     | Equation applied for power consumption                                                                                              | Conditions                                                                                                                                                                                                                                                                                                                                                                                                                                                                                                                                                                                                                                                                                                                                                                                                                    |
|------------------|-------------------------------------------------------------------------------------------------------------------------------------|-------------------------------------------------------------------------------------------------------------------------------------------------------------------------------------------------------------------------------------------------------------------------------------------------------------------------------------------------------------------------------------------------------------------------------------------------------------------------------------------------------------------------------------------------------------------------------------------------------------------------------------------------------------------------------------------------------------------------------------------------------------------------------------------------------------------------------|
| Gyratory milling | $\{W_i \times Q [\sqrt{f_{80}} - \sqrt{P_{80}}] \times \sqrt{(100/P_{80})}\} / \sqrt{f_{80}}$ (in kW)<br>where                      | Where, $W_i$ is work index = 15 $\text{kWh.t}^{-1}$ ; $Q$ is capacity = 1 $\text{t.h}^{-1}$ ; $f_{80}$ is the size through which 80% of the mineral feed passes = 50 mm; $P_{80}$ is the size through which 80% of the product passes = 5 mm                                                                                                                                                                                                                                                                                                                                                                                                                                                                                                                                                                                  |
| Ball milling     | $W = W_i \times ((10/\sqrt{P}) - 10/\sqrt{F})$<br><br>$W_i = 1.1 \times 44.5 / (P_k^{0.23} G^{0.82} ((10/\sqrt{P}) - 10/\sqrt{F}))$ | Where, $W$ is the energy consumption for grinding (in $\text{kWh.t}^{-1}$ ); $W_i$ is work index (in $\text{kWh.t}^{-1}$ ); $P$ is the screen aperture through which 80% of the material passes before grinding (in $\mu\text{m}$ ); $F$ is the screen aperture size through which 80% of the material passes before grinding (in $\mu\text{m}$ )<br><br>Where, $W_i$ is work index (in $\text{kWh.t}^{-1}$ ); $P$ is the screen aperture through which 80% of the material passes before grinding (in $\mu\text{m}$ ); $F$ is the screen aperture size through which 80% of the material passes before grinding (in $\mu\text{m}$ ); $P_k$ is the aperture size of test screen used for determination of the work index (in $\mu\text{m}$ ); $G$ is the newly formed mass passing a test screen each mill revolution (in g). |

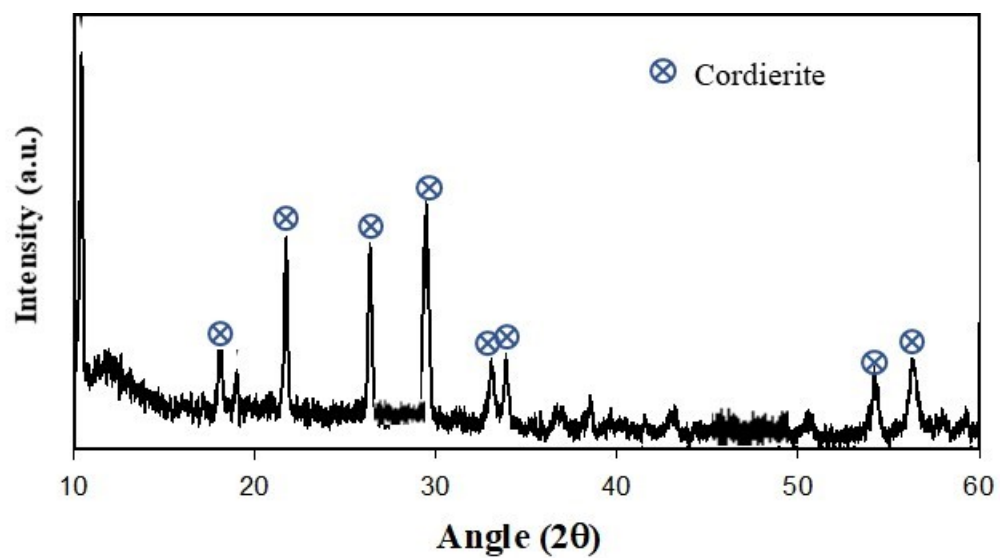

**Fig. S1.** XRD pattern of exhausted catalytic converters.

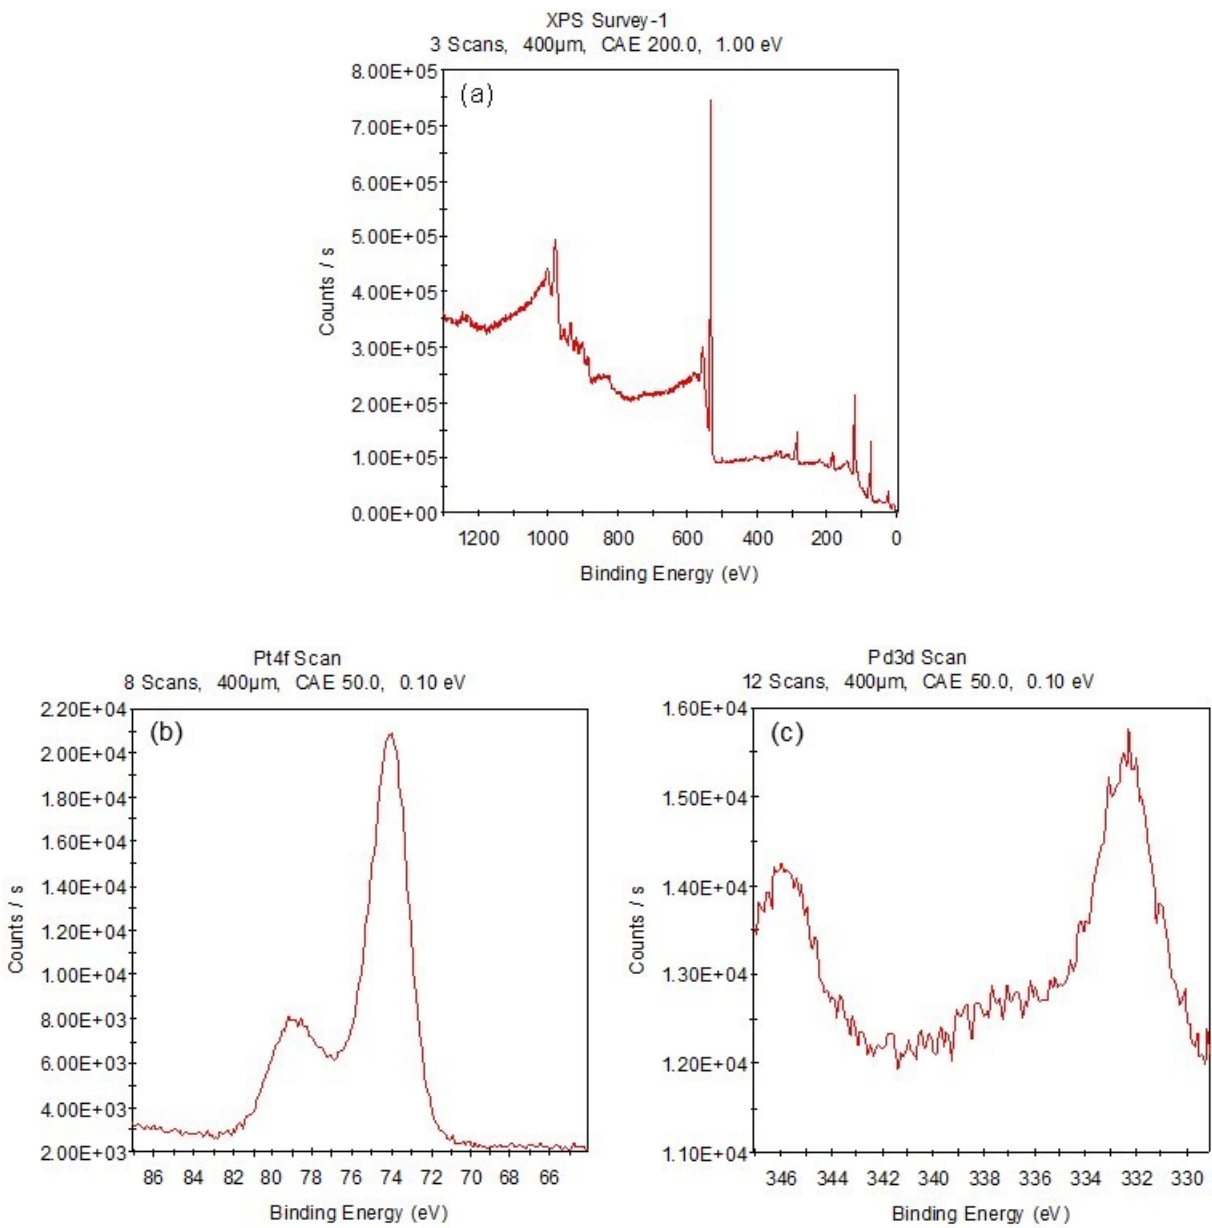

**Fig. S2.** XPS analysis of the sample for full scan **(a)**, Pt **(b)**, and Pd **(c)** scan.

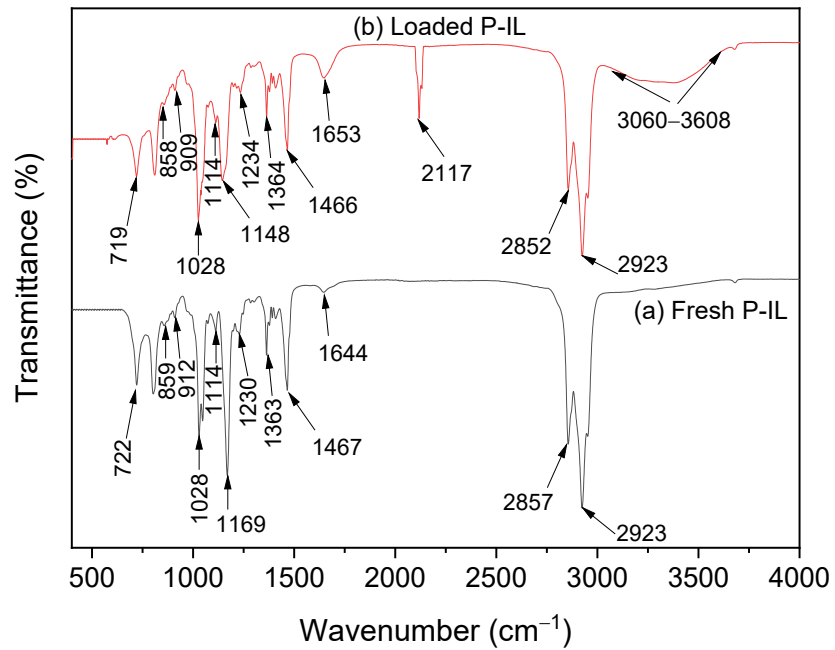

**Fig. S3.** FTIR spectrum of fresh ionic-liquid Cyphos IL101 **(a)** and (Pt,Pd)-loaded ionic-liquid phase **(b)**.

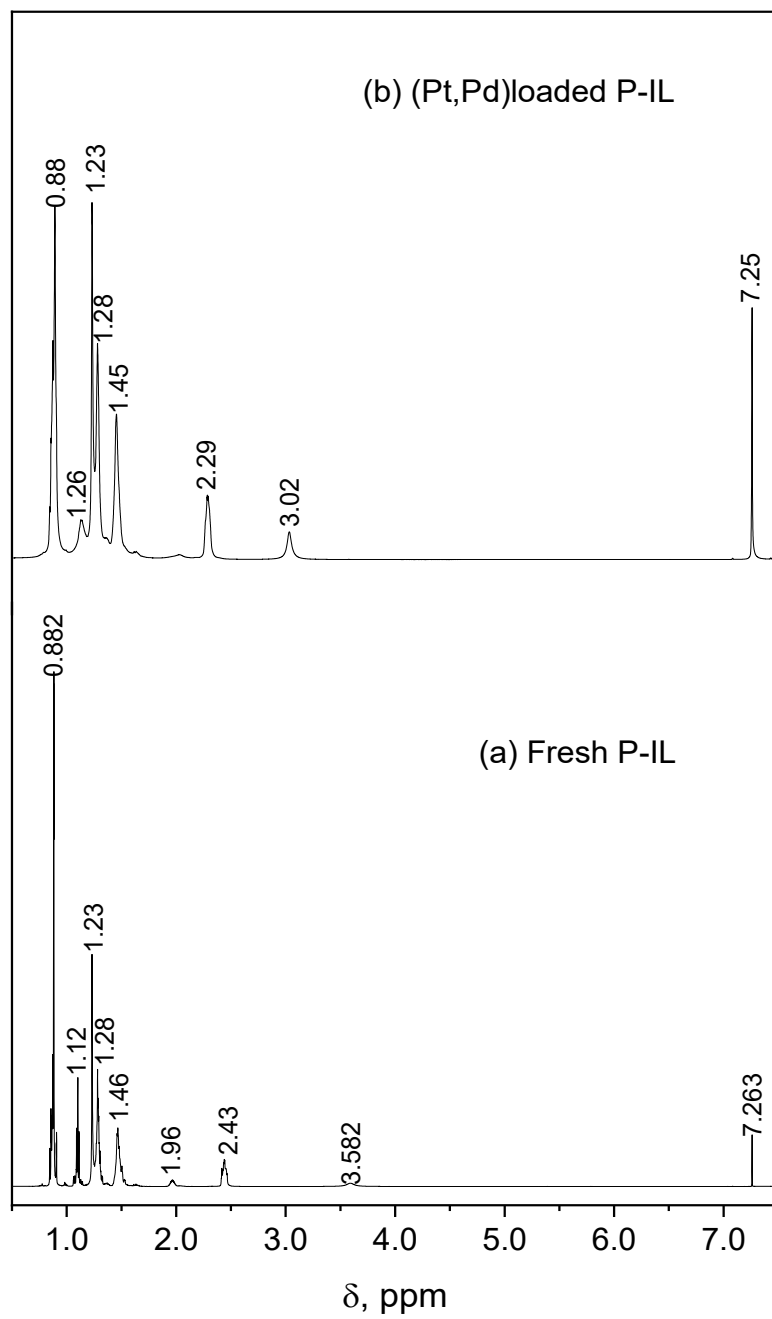

**Fig. S4.** <sup>1</sup>H-NMR of fresh **(a)** and (Pt,Pd)-loaded **(b)** ionic liquid phase.



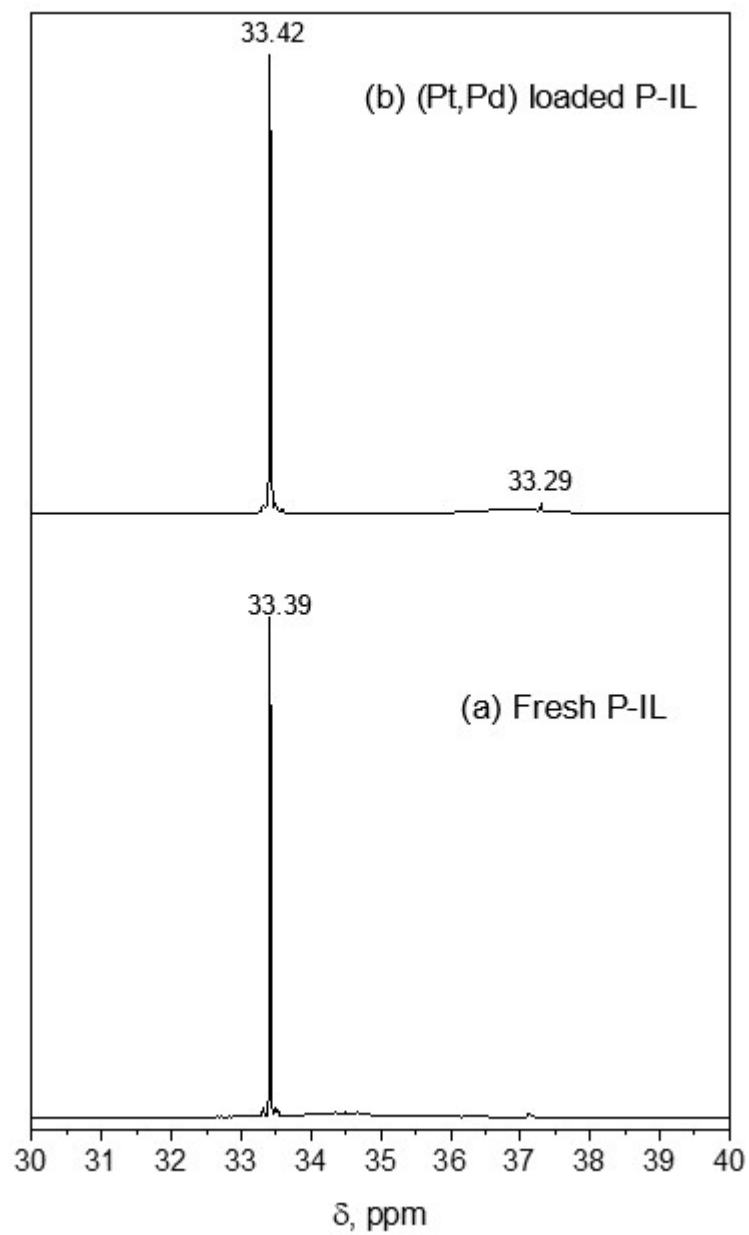

**Fig. S5.**  $^{31}\text{P}$  NMR of fresh (a) and (Pt,Pd)-loaded (b) ionic liquid phase.

## References

- [1] O. Lanaridi, A.R. Sahoo, A. Limbeck, S. Naghdi, D. Eder, E. Eitenberger, Z. Csendes, M. Schnürch, K. Bica-Schröder, Toward the Recovery of Platinum Group Metals from a Spent Automotive Catalyst with Supported Ionic Liquid Phases, *ACS Sustainable Chem. Eng.* 9 (2021) 375–386.
- [2] W. Wei, C.W. Cho, S. Kim, M.H. Song, J.K. Bediako, Y.S. Yun, Selective recovery of Au(III), Pt(IV), and Pd(II) from aqueous solutions by liquid–liquid extraction using ionic liquid Aliquat-336, *J. Mol. Liq.* 216 (2016) 18–24.
- [3] J.M. Lee, Extraction of noble metal ions from aqueous solution by ionic liquids, *Fluid Phase Equilib.* 319 (2012) 30–36.
- [4] M. Rzelewska, M. Wiśniewski, M. Regel-Rosocka, Effect of composition and ageing of chloride solutions on extraction of Rh(III) and Ru(III) with phosphonium ionic liquids Cyphos IL 101 and IL 104, *Sep. Sci. Technol.* 53 (2018) 1249–1260.
- [5] M. Rzelewska-Piekut, M. Regel-Rosocka, Separation of Pt(IV), Pd(II), Ru(III) and Rh(III) from model chloride solutions by liquid-liquid extraction with phosphonium ionic liquids, *Sep. Purif. Technol.* 212 (2019) 791–801.
- [6] V.T. Nguyen, J. Lee, A. Chagnes, M. Kim, J. Jeong, G. Cote, Highly selective separation of individual platinum group metals (Pd, Pt, Rh) from acidic chloride media using phosphonium-based ionic liquid in aromatic diluents, *RSC Adv.* 67 (2016) 62717–62728.
